# 1 **Defining the genetic control of human blood plasma N-** 2 **glycome using genome-wide association study**

3  
4 Sodbo Zh. Sharapov<sup>1,2</sup>, Yakov A. Tsepilov<sup>1,2</sup>, Lucija Klaric<sup>3,4</sup>, Massimo Mangino<sup>5,6</sup>, Gaurav  
5 Thareja<sup>7</sup>, Mirna Simurina<sup>8</sup>, Concetta Dagostino<sup>9</sup>, Julia Dmitrieva<sup>10</sup>, Marija Vilaj<sup>3</sup>,  
6 Frano Vuckovic<sup>3</sup>, Tamara Pavic<sup>8</sup>, Jerko Stambuk<sup>3</sup>, Irena Trbojevic-Akmacic<sup>3</sup>, Jasminka Kristic<sup>3</sup>,  
7 Jelena Simunovic<sup>3</sup>, Ana Momcilovic<sup>3</sup>, Harry Campbell<sup>11,12</sup>, Malcolm Dunlop<sup>12</sup>, Susan  
8 Farrington<sup>12</sup>, Maja Pucic-Bakovic<sup>3</sup>, Christian Gieger<sup>13</sup>, Massimo Allegri<sup>14</sup>, Edouard Louis<sup>15</sup>,  
9 Michel Georges<sup>10</sup>, Karsten Suhre<sup>7</sup>, Tim Spector<sup>5</sup>, Frances MK Williams<sup>5</sup>, Gordan Lauc<sup>3,8</sup>, Yurii  
10 Aulchenko<sup>1,2,16</sup>

11  
12 <sup>1</sup>Institute of Cytology and Genetics SB RAS, Prospekt Lavrentyeva 10, Novosibirsk, 630090,  
13 Russia

14 <sup>2</sup>Novosibirsk State University, 1, Pirogova str., Novosibirsk, 630090, Russia

15 <sup>3</sup>Genos Glycoscience Research Laboratory, Borongajska cesta 83h, 10000 Zagreb, Croatia

16 <sup>4</sup>Human Genetics Unit, MRC, Institute of Genetics and Molecular Medicine, University of  
17 Edinburgh, Crewe Road South, Edinburgh EH4 2XU, UK

18 <sup>5</sup>Department of Twin Research and Genetic Epidemiology, King's College London, St Thomas'  
19 Campus, Lambeth Palace Road, London, SE1 7EH, UK

20 <sup>6</sup>NIHR Biomedical Research Centre at Guy's and St Thomas' Foundation Trust, London SE1  
21 9RT, UK.

22 <sup>7</sup>Department of Physiology and Biophysics, Weill Cornell Medicine-Qatar, Education City, PO  
23 24144 Doha, Qatar

24 <sup>8</sup>Faculty of Pharmacy and Biochemistry, University of Zagreb, Ante Kovacica 1, 10 000 Zagreb,  
25 Croatia

26 <sup>9</sup>Critical Care and Pain Medicine Unit, Division of Surgical Sciences, Department of Medicine and  
27 Surgery, University of Parma, Via Gramsci 14, 43126 Parma, Italy

28 <sup>10</sup>Unit of Animal Genomics, WELBIO, GIGA-R & Faculty of Veterinary Medicine, University of  
29 Liège (B34), 1 Avenue de l'Hôpital, Liège 4000, Belgium

30 <sup>11</sup>Centre for Global Health Research, Usher Institute of Population Health Sciences and  
31 Informatics, The University of Edinburgh, Edinburgh EH8 9AG, UK

32 <sup>12</sup>Colon Cancer Genetics Group, MRC Human Genetics Unit, MRC Institute of Genetics &  
33 Molecular Medicine, Western General Hospital, The University of Edinburgh, Edinburgh EH4  
34 2XU, UK

35 <sup>13</sup>Institute of Epidemiology II, Research Unit of Molecular Epidemiology, Helmholtz Centre  
36 Munich, German Research Center for Environmental Health, Ingolstädter Landstr. 1, D-85764,  
37 Neuherberg, Germany

38 <sup>14</sup>Anesthesia and Intensive Care Department, IRCCS MultiMedica Hospital, Via Milanese 300,  
39 20099Sesto San Giovanni, Italy

40 <sup>15</sup>CHU-Liège and Unit of Gastroenterology, GIGA-R & Faculty of Medicine, University of Liège,  
41 1 Avenue de l'Hôpital, Liège 4000, Belgium

42 <sup>16</sup>PolyOmica, Het Vlaggeschip 61, 5237 PA 's-Hertogenbosch, The Netherlands

43

44 **Key words:** glycomics, glycans, genome-wide association study

## 45 **Abstract**

46 Glycosylation is a common post-translational modification of proteins. It is known, that glycans  
47 are directly involved in the pathophysiology of every major disease. Defining genetic factors  
48 altering glycosylation may provide a basis for novel approaches to diagnostic and pharmaceutical  
49 applications. Here, we report a genome-wide association study of the human blood plasma N-  
50 glycome composition in up to 3811 people. We discovered and replicated twelve loci. This  
51 allowed us to demonstrate a clear overlap in genetic control between total plasma and IgG  
52 glycosylation. Majority of loci contained genes that encode enzymes directly involved in  
53 glycosylation (*FUT3/FUT6*, *FUT8*, *B3GAT1*, *ST6GAL1*, *B4GALT1*, *ST3GAL4*, *MGAT3*, and  
54 *MGAT5*). We, however, also found loci that are likely to reflect other, more complex, aspects of  
55 plasma glycosylation process. Functional genomic annotation suggested the role of *DERL3*, which  
56 potentially highlights the role of glycoprotein degradation pathway, and such transcription factor  
57 as *IKZF1*.

58

## 59 **Introduction**

60 Glycosylation - addition of carbohydrates to a substrate - is a common cotranslational and  
61 posttranslational modification of proteins. that affects the physical properties of proteins  
62 (solubility, conformation, folding, stability, trafficking, etc.) [1–4] as well as their biological  
63 functions - from protein-protein interactions, interaction of proteins with receptors, to cell-cell,  
64 cell-matrix, and host-pathogen interactions [2,3,5,6]. It has been estimated that more than half of  
65 all proteins are glycosylated [7–9]. Given the fact that glycans participate in many biological  
66 processes, it is therefore not surprising that molecular defects in protein glycosylation pathways  
67 are increasingly recognized as direct causes of diseases, such as rheumatoid arthritis,  
68 cardiometabolic disorders, cancer, variety of autoimmune diseases, type 2 diabetes, inflammatory  
69 bowel disease and others [10–17]. More specifically, a variety of N-glycan structures are now  
70 considered as disease markers and represent diagnostic as well as therapeutic targets [5,12,18–25].  
71 Defining the genetic control of protein glycosylation expands our knowledge about the regulation  
72 of this fundamental biological process, and it may also shed new light onto how alterations in  
73 glycosylation can lead to the development of complex human diseases [11].

74 Previous genome-wide association studies (GWAS) of total plasma protein N-glycome  
75 measured with high performance liquid chromatography (HPLC) discovered six loci associated  
76 with protein glycosylation [26,27]. Four of these contained genes that have well characterized  
77 roles in glycosylation: the fucosyltransferases *FUT6* and *FUT8*, glucuronyltransferase *B3GAT1*,  
78 and glucosaminyltransferase *MGAT5*. Other two loci—one near *SLC9A9* on chromosomes 3 and  
79 one near *HNF1a* on chromosome 12—did not contain any genes known to be involved in  
80 glycosylation processes. A functional *in vitro* follow-up study in HepG2 cells [27] on the *HNF1a*  
81 locus on chromosome 12, showed that its gene product acts as a co-regulator of expression of most  
82 fucosyltransferase genes (*FUT3*, *FUT5*, *FUT6*, *FUT8*, *FUT10*, *FUT11*). In addition, it co-regulates  
83 expression of genes encoding key enzymes required for the synthesis of GDP-fucose, the substrate  
84 of these fucosyltransferases. It was concluded that *HNF1a* is one of the master regulators of  
85 protein glycosylation, influencing both core and antennary fucosylation [26]. The locus on  
86 chromosome 3 contained *SLC9A9*, a gene that encodes a proton pump which affects pH in the  
87 endosomal compartment, reminiscent of recent findings that changes in Golgi pH can impair  
88 protein sialylation, suggesting a possible mechanism for the observed association with N-  
89 glycosylation traits.

90 Since 2011, when the latest GWAS of plasma N-glycome was published, new technologies  
91 for glycome profiling were developed [28]. Ultra-performance liquid chromatography (UPLC)  
92 became a widely used technology for accurate analysis of plasma N-glycosylation due to its  
93 superior sensitivity, resolution, speed, and its capability to provide branch-specific information of  
94 glycan structures [29]. Moreover, new imputation panels (such as 1000 Genomes [30] and HRC  
95 [31]) became available, increasing the resolution and power of genetic mapping.

96 In this work, we aimed to advance our understanding of the genetic control of the human  
97 plasma N-glycome, and to establish a public resource that will facilitate future studies linking  
98 glycosylation and complex human diseases. For that, we performed and reported results of GWAS  
99 on 113 plasma glycome traits measured by UPLC and genotypes imputed to the 1000 Genomes  
100 reference panel in 2,763 participants of TwinsUK. Further we replicated our findings in 1,048  
101 samples from three independent and genetically diverse cohorts - PainOR, SOCCS and QMDiab.

102

## 103 Results

### 104 Replication of previously reported loci

105 We started with replication of six loci that were reported previously. Huffman and colleagues [27]  
 106 analyzed four independent cohorts with total sample size of 3,533, using plasma N-glycome  
 107 measured with HPLC. Because of technological differences, there is no one-to-one correspondence  
 108 between HPLC and UPLC traits, and exact replication is not possible. Therefore, we analyzed  
 109 association of the SNPs reported by [27] with all 113 UPLC traits measured in this study, and  
 110 considered a locus replicated if we observed P-value  $\leq 0.05/(6 \times 30) = 2.78 \times 10^{-4}$  (where 30 is a  
 111 number of principal components, explaining 99% of the variation of the 113 studied traits) in the  
 112 TwinsUK cohort (N=2,763). Using this procedure, we replicated 5 of the 6 previously reported  
 113 SNPs (Table 1). For more details, see Supplementary Table 1.

114 These results not only confirm previous and establish five plasma glycome loci as  
 115 replicated, but also demonstrate that our study is well powered (among replicated loci, all P-value  
 116 were less than  $4 \times 10^{-7}$ ).

117

118 **Table 1. Replication of six previously found loci (Huffman et al, 2011).** Replicated loci are in bold. CHR:POS -  
 119 chromosome and position of SNP, Eff/Ref - effective and reference allele, Gene - candidate gene for the locus, EAF -  
 120 effective allele frequency, N - sample size, BETA(SE) - effect and standard error of effect estimates, min P - minimal  
 121 P-value, observed across glycomic traits.

122

| SNP               | CHR:POS      | Gene          | Eff/Ref | Results of Huffman et al, 2011 (N=3,533) |      |             |          | This study, TwinsUK (N=2,763) |              |          |
|-------------------|--------------|---------------|---------|------------------------------------------|------|-------------|----------|-------------------------------|--------------|----------|
|                   |              |               |         | EAF                                      | N    | BETA(SE)    | min P    | EAF                           | BETA(SE)     | min P    |
| <b>rs1257220</b>  | 2:135015347  | <i>MGAT5</i>  | A/G     | 0.26                                     | 3263 | 0.19(0.03)  | 1.80E-10 | 0.25                          | 0.16(0.032)  | 3.98E-07 |
| <b>rs4839604</b>  | 3:142960273  | <i>SLC9A9</i> | C/T     | 0.77                                     | 3320 | -0.22(0.03) | 3.50E-13 | 0.83                          | -0.11(0.038) | 2.50E-03 |
| <b>rs7928758</b>  | 11:134265967 | <i>B3GAT1</i> | T/G     | 0.88                                     | 3233 | 0.23(0.04)  | 1.66E-08 | 0.84                          | 0.24(0.038)  | 6.07E-10 |
| <b>rs735396</b>   | 12:121438844 | <i>HNF1a</i>  | T/C     | 0.61                                     | 3236 | 0.18(0.03)  | 7.81E-12 | 0.65                          | 0.18(0.031)  | 6.06E-09 |
| <b>rs11621121</b> | 14:65822493  | <i>FUT8</i>   | C/T     | 0.43                                     | 3234 | 0.27(0.03)  | 1.69E-23 | 0.40                          | 0.21(0.029)  | 1.60E-12 |
| <b>rs3760776</b>  | 19:5839746   | <i>FUT6</i>   | G/A     | 0.87                                     | 3262 | 0.44(0.04)  | 3.18E-29 | 0.91                          | 0.56(0.050)  | 3.71E-28 |

123

### 124 Discovery and replication of new loci

125 The discovery cohort comprised 2,763 participants of the TwinsUK study with genotypes available  
 126 for 8,557,543 SNPs. The genomic control inflation factor varied from 0.99 to 1.02, suggesting that  
 127 influences of residual population stratification on the test statistics were small (see Supplementary  
 128 Table 2; QQ-plots in Supplementary Figure 1). In total, 906 SNPs located in 14 loci were

129 significantly associated ( $P\text{-value} \leq 5 \times 10^{-8} / 30 = 1.66 \times 10^{-9}$ , where 30 is a number of principal  
 130 components, explaining 99% of the variation of the 113 studied traits) with at least one of 113  
 131 glycan traits (in total 5,052 SNP-trait associations, see Figure 1, Table 1). Out of 113 traits, 68  
 132 were significantly associated with at least one of the 14 loci. For more details, see Supplementary  
 133 Table 3.

134

135 **Table 2. Fourteen loci genome-wide significantly associated with at least one of the 113 traits in this study.** Ten  
 136 loci in the upper part of the table are novel, and four loci in the lower part of the table were found previously.  
 137 Replicated loci are in bold. CHR:POS - chromosome and position of SNP, Gene –suggested candidate genes (see  
 138 Table 3), Eff/Ref - effective and reference allele, EAF - effective allele frequency, BETA(SE) - effect and standard  
 139 error of effect estimates, P-value - P-value after GC correction, Top trait –glycan trait with the strongest association  
 140 (lowest P-value), N traits - total number of traits significantly associated with given locus, N - sample size of  
 141 replication.  
 142

| SNP                               | CHR:POS      | Gene                       | Eff / Ref | Discovery |               |          |           |          | Replication |               |          |      |
|-----------------------------------|--------------|----------------------------|-----------|-----------|---------------|----------|-----------|----------|-------------|---------------|----------|------|
|                                   |              |                            |           | EAF       | BETA (SE)     | P-value  | Top trait | N traits | EAF         | BETA (SE)     | P        | N    |
| <b>Novel loci</b>                 |              |                            |           |           |               |          |           |          |             |               |          |      |
| rs186127900                       | 1:25318225   | -                          | G/T       | 0.99      | -1.26 (0.119) | 4.04E-24 | PGP82     | 26       | 0.99        | -0.35 (0.224) | 1.22E-01 | 1093 |
| rs59111563                        | 3:186722848  | <i>ST6GAL1</i>             | D/I       | 0.74      | 0.34 (0.031)  | 1.09E-26 | PGP41     | 3        | 0.73        | 0.32 (0.048)  | 9.50E-12 | 1088 |
| rs3115663                         | 6:31601843   | -                          | T/C       | 0.80      | 0.26 (0.040)  | 7.65E-11 | PGP18     | 1        | 0.83        | 0.06 (0.059)  | 3.01E-01 | 1093 |
| rs6421315                         | 7:50355207   | <i>IKZF1</i>               | G/C       | 0.59      | 0.19 (0.029)  | 7.57E-11 | PGP60     | 2        | 0.60        | 0.27 (0.043)  | 5.67E-10 | 1077 |
| rs13297246                        | 9:33128617   | <i>B4GALT1</i>             | G/A       | 0.83      | -0.26 (0.038) | 4.11E-12 | PGP67     | 2        | 0.83        | -0.26 (0.059) | 8.66E-06 | 1093 |
| rs3967200                         | 11:126232385 | <i>ST3GALA</i>             | C/T       | 0.88      | -0.49 (0.043) | 1.51E-27 | PGP17     | 7        | 0.86        | -0.53 (0.062) | 6.85E-18 | 1093 |
| rs35590487                        | 14:105989599 | <i>IGH /<br/>TMEM121</i>   | C/T       | 0.77      | -0.24 (0.034) | 7.98E-12 | PGP62     | 2        | 0.78        | -0.17 (0.058) | 3.67E-03 | 1093 |
| rs9624334                         | 22:24166256  | <i>DERL3 /<br/>CHCHD10</i> | G/C       | 0.85      | 0.28 (0.040)  | 8.38E-12 | PGP63     | 2        | 0.86        | 0.42 (0.062)  | 2.09E-11 | 1086 |
| rs140053014                       | 22:29550678  | -                          | I/D       | 0.98      | -0.67 (0.106) | 4.05E-10 | PGP109    | 1        | 0.98        | -0.24 (0.165) | 1.50E-01 | 1079 |
| rs909674                          | 22:39859169  | <i>MGAT3</i>               | C/A       | 0.27      | 0.22 (0.033)  | 7.72E-11 | PGP56     | 3        | 0.25        | 0.18 (0.053)  | 5.70E-04 | 1045 |
| <b>Previously implicated loci</b> |              |                            |           |           |               |          |           |          |             |               |          |      |
| rs1866767                         | 11:134274763 | <i>B3GAT1</i>              | C/T       | 0.87      | 0.28 (0.043)  | 5.95E-11 | PGP33     | 3        |             |               |          |      |
| rs1169303                         | 12:121436376 | <i>HNF1a</i>               | A/C       | 0.51      | 0.19 (0.029)  | 2.23E-10 | PGP30     | 2        |             |               |          |      |
| rs7147636                         | 14:66011184  | <i>FUT8</i>                | T/C       | 0.33      | -0.39 (0.030) | 6.63E-37 | PGP20     | 17       |             |               |          |      |
| rs7255720                         | 19:5828064   | <i>FUT6</i>                | G/C       | 0.96      | 1.14 (0.068)  | 2.53E-55 | PGP110    | 18       |             |               |          |      |

143

144 Among fourteen loci, four were previously reported as associated with the plasma N-  
 145 glycome. Three loci—on chromosome 12 at 121 Mb (leading SNP rs1169303, intronic variant of  
 146 the *HNF1a* gene), on chromosome 14 at 105 Mb (leading SNP - rs7147636 located in the intron of  
 147 *FUT8* gene), and on chromosome 19 at 58 Mb (leading SNP: rs7255720, upstream variant of the  
 148 *FUT6* gene)—were reported to be associated with the plasma N-glycome in two previous GWAS  
 149 [26,27], while association of a locus on chromosome 11 at 126 Mb (leading SNP - rs1866767  
 150 located in the intron of *B3GAT1* gene) was reported only in the latest GWAS meta-analysis of  
 151 plasma N-glycome [27].

152 Ten further loci that have not been reported before were found here. In order to replicate  
153 our findings, we have performed association analysis of these ten SNPs in three independent  
154 cohorts— PainOR, SOCCS and QMDiab (total N =1,048)—and then meta-analyzed the results.  
155 Seven of ten novel loci were replicated at threshold P-value  $\leq 0.05/10 = 0.005$  (see Table 2). The  
156 direction of association was concordant between discovery and replication for all ten loci. The  
157 effects of loci between the replication cohorts were homogeneous (P-value of Cochran's Q-test  
158 varied from 0.07 to 0.96, see Supplementary Table 3).

159 Given seven replicated novel loci found in this study and five loci found previously and  
160 replicated in this study we now have 12 replicated loci in total.

161

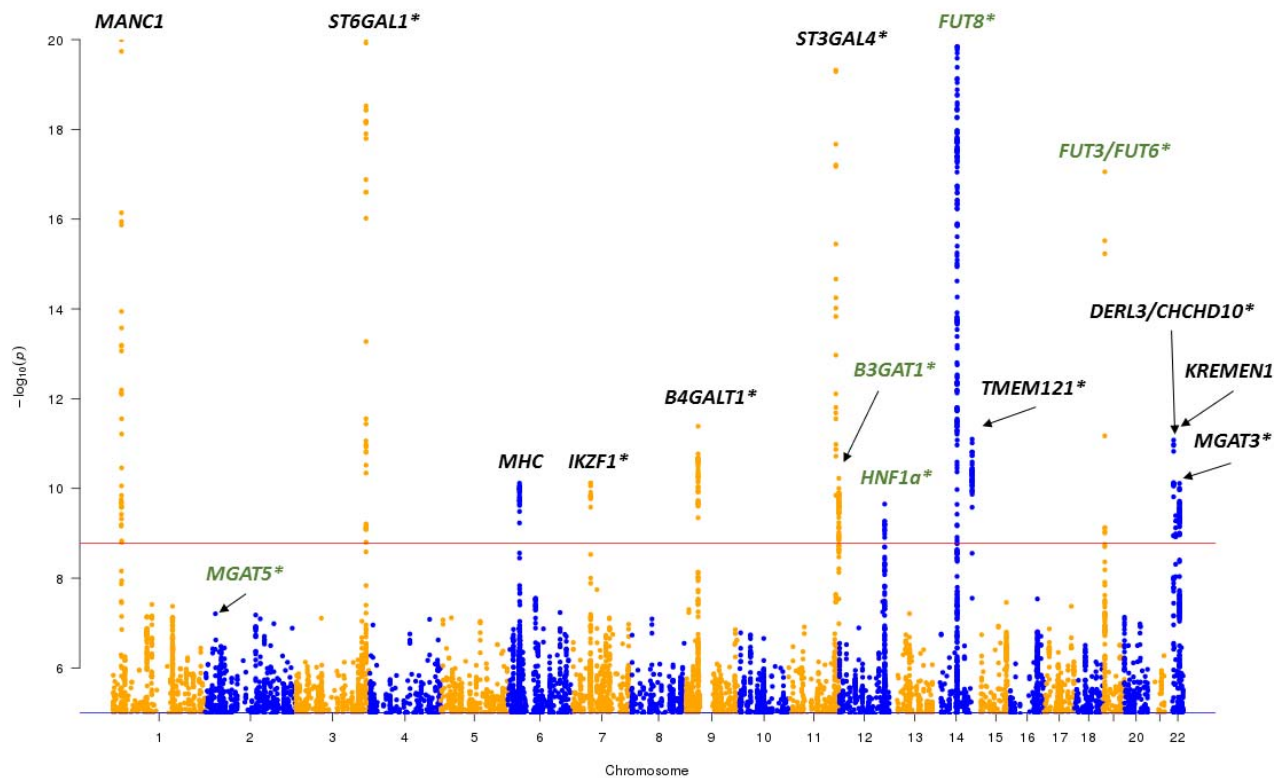

162  
163 **Figure 1. Manhattan plot of discovery GWAS (after correction for genomic control).** Red line corresponds to the  
164 genome-wide significance threshold of  $1.7 \times 10^{-9}$ . For each SNP the lowest P-value among 113 traits is shown. Only  
165 SNPs with P-values  $\leq 1 \times 10^{-5}$  are shown. Points with  $-\log_{10}(P\text{-value}) > 20$  are depicted at  $-\log_{10}(P\text{-value}) = 20$ . Green  
166 colored gene labels marks loci that were found in previous GWAS [27]; black colored marks novel loci, \* - replicated  
167 loci.  
168

## 169 **Functional annotation *in-silico***

### 170 **Analysis of possible effects of genetic variants with VEP**

171 We have used variant effect predictor [32] in order to find functional variants that potentially  
172 disturb amino acid sequence and may explain association in some loci. For that, within each locus,  
173 we identified a set of SNPs that are likely to contain the functional variant by selecting SNPs that  
174 had association p-value deviating from the minimal p-value by less than one order of magnitude.  
175 The results of variant effect predictor [32] annotation of the resulting 214 SNPs are presented in  
176 Supplementary Table 4b. For the locus on chromosome 19 at 58 Mb, we have observed that  
177 rs17855739 variant is missense for five transcripts of the *FUT6* gene; for four of these transcripts  
178 rs17855739 was classified as probably damaging and for one as benign by PolyPhen [33], whereas  
179 SIFT [34] classified all five variants as deleterious. For the locus on chromosome 22 at 24 Mb, we  
180 detected rs3177243 variant that is missense for three transcripts of *DERL3* gene, for which  
181 rs3177243 was predicted to be deleterious by SIFT (although was classified as benign by  
182 PolyPhen). For locus on chromosome 14 at 105/106 Mb, in *TMEM121* gene, we observed that  
183 rs10569304 variant led to three nucleotides in-frame deletion in two transcripts of *TMEM121*  
184 gene.

### 185 **Gene-set and tissue/cell enrichment analysis**

186 For prioritizing genes in associated regions (based on their predicted function) and gene set and  
187 tissue/cell type enrichment analyses we used DEPICT software [35]. When running DEPICT  
188 analyses on the 14 genome-wide significant loci (from Table 1) we identified tissue/cell type  
189 enrichment (with  $FDR < 0.05$ ) for six tissue/cell types: plasma cells, plasma, parotid gland, salivary  
190 glands, antibody producing cells and B-lymphocytes (see Supplementary Table 5c). We did not  
191 identify any significant enrichment for gene-sets (all  $FDR > 0.2$ , Supplementary Table 5b). Based  
192 on predicted gene function and reconstituted gene sets, DEPICT suggestively prioritized three  
193 genes - *FUT3*, *DERL3* and *FUT8* for three loci (on chromosome 19 at 58 Mb, on chromosome 22  
194 at 24 Mb and on chromosome 14 at 65/66 Mb) with  $FDR < 0.20$  (see Supplementary Table 5a).  
195 We have also analyzed 93 loci with P-value  $\leq 1 \times 10^{-5}/30$  (Supplementary Table 6), however, all  
196 results had  $FDR > 0.2$ .



## 197 **Overlap with complex traits**

198 We next investigated the potential pleiotropic effects of our loci on other complex human traits  
199 and diseases, using PhenoScanner v1.1 database [36]. For twelve replicated SNPs (Table 1 and  
200 Table 2), we looked up traits that were genome-wide significantly ( $P\text{-value} \leq 5 \times 10^{-8}$ ) associated  
201 with the same SNP or a SNP in strong ( $r^2 < 0.7$ ) linkage disequilibrium. The results are  
202 summarized in Supplementary Table 7. For eight out of twelve loci, we observed associations with  
203 a number of complex traits. Four loci (near *IKZF1*, *FUT8*, *MGAT3* and *DERL3*) were associated  
204 with levels of glycosylation of immunoglobulin G (IgG) [13]. Two loci (on chromosome 12 at 121  
205 Mb and on chromosome 11 at 126 Mb, containing *HNF1a* and *ST3GAL4* genes respectively) were  
206 associated with LDL and total cholesterol levels [37,38]. The locus containing *HNF1a* was  
207 additionally associated with level of plasma C reactive protein [39,40] and gamma glutamyl  
208 transferase level [41]. Locus on chromosome 22 at 39 Mb (containing *MGAT3*) was associated  
209 with adult height [42]. Locus on chromosome 14 at 65/66 Mb (near *FUT8*) was associated with  
210 age at menarche [43]. Note, however, that PhenoScanner analysis does not allow distinguishing  
211 between pleiotropy of a variant shared between traits, and linkage disequilibrium between different  
212 functional variants affecting separate traits.

## 213 **Pleiotropy with eQTLs**

214 We next attempted to identify genes whose expression levels could potentially mediate the  
215 association between SNPs and plasma N-glycome. For this we performed a summary-data based  
216 Mendelian randomization (SMR) analysis followed by heterogeneity in dependent instruments  
217 (HEIDI) analysis [44] using a collection of eQTL data from a range of tissues, including blood  
218 [45], 44 tissues as provided in the GTEx database version 6p [46] and six blood cell lines collected  
219 in the CEDAR study (see Supplementary Note 3 and [47]) - five immune cell populations (CD4+,  
220 CD8+, CD19+, CD14+, CD15+) and platelets. In short, SMR test aims at testing the association  
221 between gene expression (in a particular tissue) and a trait using the top associated SNP as a  
222 genetic instrument. Significant SMR test may indicate that the same functional variant determines  
223 both expression and the trait of interest (causality or pleiotropy), but may also indicate the  
224 possibility that functional variants underlying gene expression are in linkage disequilibrium with  
225 those controlling the traits. Inferences whether functional variant may be shared between plasma

226 glycan trait and expression were made based on HEIDI test:  $P_{\text{HEIDI}} \geq 0.05$  (likely shared),  $0.05$   
227  $> P_{\text{HEIDI}} \geq 0.001$  (possibly shared),  $P_{\text{HEIDI}} < 0.001$  (sharing is unlikely).

228 We applied SMR/HEIDI analyses for replicated loci that demonstrated genome-significant  
229 association in our discovery data (11 loci in total). In total, we included in the analysis expression  
230 levels of 20,448 transcripts (probes). For fifteen probes located in seven loci associated with  
231 plasma glycosylation we observed significant ( $P_{\text{SMR}} \leq 0.05/20,448 = 2.445 \times 10^{-6}$ ) association to the  
232 top SNPs associated with plasma N-glycome (see Supplementary Table 8). Subsequent HEIDI test  
233 showed that the hypothesis of shared functional variant between plasma glycan traits and  
234 expression is most likely ( $P_{\text{HEIDI}} > 0.05$ ) for four probes: *ST6GAL1* in whole blood (from Westra *et*  
235 *al.*, [45]; *TMEM121* in whole blood (GTEx, [46]); *MGAT3* in CD19+ cell line (CEDAR, [47]) and  
236 *CHCHD10* in whole blood (results of Westra *et al.*, [45]). For other five probes we conclude that  
237 the functional variant is possibly shared ( $0.001 < P_{\text{HEIDI}} < 0.05$ ) between glycan traits and expression  
238 of *ST3GALA* (in two different tissues: muscle skeletal and pancreas, GTEx [46]); *B3GAT1* (in two  
239 tissues: whole blood from Westra *et al.*, [45], and lung tissue from GTEx, [46]); *SYNGR1* (in tibial  
240 nerve tissue from GTEx [46]).

241

242 **Table 3.** Summary of functional *in-silico* annotation for the replicated loci. For each locus we  
 243 report the gene nearest to the top SNP and a plausible candidate gene with sources of evidence.  
 244 CV - coding variant for the gene, suggested by VEP; SMR/HEIDI – evidence by pleiotropy with  
 245 expression by SMR-HEIDI; D – evidence by DEPICT; Funct. studies – evidence by functional  
 246 studies; Glycan synth. – known glycan synthesis gene in the locus; Prev. annot. – the region was  
 247 previously implicated in the glycome GWAS, and the gene was suggested as candidate (PI - gene  
 248 was reported as affecting plasma N-glycome by Huffman et al., 2011 [27]; IgG - gene was  
 249 reported as affecting IgG glycome either by Lauc et al., 2013 [13] and/or by Shen et al., 2017  
 250 [48]).  
 251

| Locus                             | Nearest gene    | Candidate Gene | CV         | SMR/HEIDI                   | DEPICT  | Func. studies | Glycan synth. | Prev. annot. |
|-----------------------------------|-----------------|----------------|------------|-----------------------------|---------|---------------|---------------|--------------|
| <b>Previously implicated loci</b> |                 |                |            |                             |         |               |               |              |
| 2:135015347                       |                 | <i>MGAT5</i>   | -          |                             |         |               | +             | PI           |
| 11:134274763                      | <i>B3GAT1</i>   | <i>B3GAT1</i>  | -          | whole blood/<br>lung        |         |               | +             | PI           |
| 12:121436376                      | <i>HNF1a</i>    | <i>HNF1a</i>   | -          |                             |         | [27]          |               | PI           |
| 14:66011184                       | <i>FUT8</i>     | <i>FUT8</i>    | -          |                             | FDR<20% |               | +             | PI,<br>IgG   |
| 19:5828064                        | <i>NRTN</i>     | <i>FUT3</i>    | -          |                             | FDR<20% |               | +             | PI           |
|                                   | <i>NRTN</i>     | <i>FUT6</i>    | rs17855739 |                             |         |               | +             | PI,<br>IgG   |
| <b>Novel loci</b>                 |                 |                |            |                             |         |               |               |              |
| 3:186722848                       | <i>ST6GAL1</i>  | <i>ST6GAL1</i> | -          | whole blood                 |         |               | +             | IgG          |
| 7:50355207                        | <i>IKZF1</i>    | <i>IKZF1</i>   | -          |                             |         |               |               | IgG          |
| 9:33128617                        | <i>B4GALT1</i>  | <i>B4GALT1</i> | -          |                             |         |               | +             | IgG          |
| 11:126232385                      | <i>ST3GAL4</i>  | <i>ST3GAL4</i> | -          | muscle<br>skeletal/pancreas |         |               | +             |              |
| 14:105989599                      | <i>C14orf80</i> | <i>TMEM121</i> | rs10569304 | whole blood                 |         |               |               |              |
|                                   | <i>C14orf80</i> | <i>IGH</i>     |            |                             |         |               |               | IgG          |
| 22:24166256                       | <i>SMARCB1</i>  | <i>DERL3</i>   | rs3177243  |                             | FDR<20% |               |               | IgG          |
|                                   | <i>SMARCB1</i>  | <i>CHCHD10</i> | -          | whole blood                 |         |               |               |              |
| 22:39859169                       | <i>MGAT3</i>    | <i>MGAT3</i>   | -          | CD19+ (B cells)             |         |               | +             | IgG          |

252

### 253 Summary of in-silico follow-up

254 We compared the genes suggested by our *in silico* functional investigation with candidate genes  
 255 suggested previously for five known loci (see Table 3). For three out of five loci (*B3GAT1*, *FUT8*,  
 256 *FUT6/FUT3*) we selected the same genes as suggested by the authors of previous study [27]. All  
 257 three genes are known to be involved into the glycan synthesis pathways. The *FUT8* locus was  
 258 associated mostly with core-fucosylated biantennary glycans, that are known to be linked to the  
 259 immunoglobulins [9]. As *FUT8* gene codes fucosyltransferase 8, an enzyme responsible for the

260 addition of core fucose to glycans, this gene is most biologically plausible in this locus. *FUT3* and  
261 *FUT6* encode fucosyltransferases 3 and 6 that catalyze the transfer of fucose from GDP-beta-  
262 fucose to alpha-2,3 sialylated substrates. The *FUT3/FUT6* locus was associated with antennary  
263 fucosylation of tri- and tetra-antennary sialylated glycans, and therefore we consider these genes as  
264 good candidates. Moreover, in the *FUT6* gene (chromosome 19, 58 Mb) we found missense  
265 variant rs17855739 (substitution G>A) that leads to amino acid change from negatively charged  
266 glutamic acid to positively charged lysine. PolyPhen and SIFT predicted this variant as deleterious  
267 for transcripts of *FUT6* gene. Thus, we can consider this SNP as possible causal functional variant.

268 For the other two loci (on chromosome 3 at 142 Mb and on chromosome 12 at 121 Mb) we  
269 were not able to prioritize genes by VEP, DEPICT, and eQTL analyses. However, the first locus  
270 contained *MGAT5* gene coding mannosyl-glycoprotein-N-acetyl glucosaminyl-transferase that is  
271 involved into the glycan synthesis pathways. The second locus contained several genes including  
272 *HNF1a* which was previously shown to co-regulate the expression of most fucosyltransferase  
273 (*FUT3*, *FUT5*, *FUT6*, *FUT8*, *FUT10*, *FUT11*) genes in a human liver cancer cell line (HepG2  
274 cells); as well as to co-regulating gene expression levels of key enzymes needed for synthesis of  
275 GDP-fucose, the substrate for fucosyltransferases, thereby regulating multiple stages in the  
276 fucosylation process [26]. Thus, we considered *HNF1a* as the candidate gene for this locus.

277 Four of the seven novel loci contain genes that are known to be involved in glycan  
278 synthesis pathways - *ST6GAL1*, *ST3GAL4*, *B4GALT1* and *MGAT3* (see Table 3). Moreover,  
279 summary level Mendelian randomization (SMR) and HEIDI analyses have shown that expression  
280 of *ST6GAL1* and *MGAT3* genes may mediate the association between corresponding loci and  
281 plasma N-glycome. *ST6GAL1* and *ST3GAL4* genes encode sialyltransferases, enzymes which  
282 catalyze the addition of sialic acid to various glycoproteins. The locus containing *ST6GAL1* was  
283 associated with ratio of sialylated and non-sialylated galactosylated biantennary glycans. The locus  
284 containing *ST3GAL4* was associated with galactosylated sialylated tri- and tetra-antennary glycans.  
285 The locus containing *MGAT3* was associated with proportion of bisected biantennary glycans. This  
286 latter gene encodes the enzyme N-acetylglucosaminyltransferase, which is responsible for the  
287 addition of bisecting GlcNAc. The *B4GALT1* gene encodes galactosyltransferase, which adds  
288 galactose during the biosynthesis of different glycoconjugates. This gene was associated with  
289 galactosylation of biantennary glycans. Thus, we observe consistency between known enzymatic

290 activities of the products of selected candidate genes and the spectrum of glycans that are  
291 associated with corresponding loci.

292 The other three novel loci do not contain genes that are known to be directly involved in  
293 glycan synthesis. Variant rs9624334 (chromosome 22 at 24 Mb) is located in the intron of  
294 *SMARCB1* gene that is known to be important in antiviral activity, inhibition of tumor formation,  
295 neurodevelopment, cell proliferation and differentiation [49]. However, gene prioritization  
296 analysis (DEPICT) showed, that the possible candidate gene is *DERL3*, which encodes a  
297 functional component of endoplasmic reticulum (ER)-associated degradation for misfolded  
298 luminal glycoproteins [50] (see Table 3). Additionally, VEP analysis demonstrated that the leading  
299 rs9624334 variant in this locus is in strong LD ( $R^2=0.98$  in 1000 Genome EUR samples) with  
300 rs3177243, which is a *DERL3* coding variant predicted to be deleterious by SIFT and PolyPhen.  
301 However, the SMR/HEIDI analysis suggested that the association with N-glycome could be (also)  
302 mediated by expression of *CHCHD10* gene, which encodes a mitochondrial protein that is  
303 enriched at cristae junctions in the intermembrane space. The *CHCHD10* gene has the highest  
304 expression in heart and liver and the lowest expression in spleen [51]. While the role of  
305 mitochondrial proteins in glycosylation processes remains speculative, we propose *CHCHD10* as a  
306 candidate based on our eQTL pleiotropy analysis. Thus, we consider two genes - *DERL3* and  
307 *CHCHD10* - as possible candidate genes at this locus. Interestingly, this and the *MGAT3* loci were  
308 associated with similar glycan traits (core-fucosylation of bisected glycans). This indicates that  
309 core fucosylation of bisected glycans is under joint control of *MGAT3* and *DERL3/CHCHD10*.

310 The locus on chromosome 14 at 105 Mb contains the *IGH* gene that encodes  
311 immunoglobulin heavy chains. This locus is associated with sialylation of core-fucosylated  
312 biantennary monogalactosylated structures that are biochemically close to those affected by  
313 *ST6GALI* gene. As IgG is the most prevalent glycosylated plasma protein [9], one would consider  
314 *IGH* as a good candidate, as indeed was suggested by Shen and colleagues [48]. However, our  
315 functional annotation results (SMR/HEIDI and VEP) suggest that association of this locus with  
316 plasma N-glycome may be mediated by regulation of expression of *TMEM121* gene. This gene  
317 encodes transmembrane protein 121 that is highly expressed in heart as well as being detected in  
318 pancreas, liver and skeletal muscle. Moreover, for the lead SNP rs35590487 we found a variant  
319 rs10569304 that is in strong linkage disequilibrium ( $R^2=0.95$  In 1000 Genome EUR samples) with

320 it, and which leads to inframe deletion in protein coding region of the *TMEM121* gene. Therefore,  
321 we consider two genes –*IGH* and *TMEM121*– as candidate genes for this locus.

322 For the locus on chromosome 7 at 50 Mb we were not able to select a candidate gene based  
323 on results of our *in-silico* functional annotation. This locus was previously reported to be  
324 associated with glycan levels of IgG [13], and authors suggested that *IKZF1* may be considered as  
325 a candidate gene in the region. The *IKZF1* gene codes the DNA-binding protein Ikaros that acts as  
326 a transcriptional regulator and is associated with chromatin remodeling. It is considered an  
327 important regulator of lymphocyte differentiation. Taking into account that IgG (the most  
328 abundant glycoprotein in the blood plasma [9]) are secreted by B cells [52], *IKZF1* seems to be a  
329 plausible candidate gene.

330 To identify possible clusters in the gene network of plasma N-glycosylation we draw a  
331 graph in which eleven genome-wide significant loci and genome-wide significantly (P-value  $\leq$   
332  $1.66 \times 10^{-9}$ ) associated glycan traits were presented as nodes, and edges represent observed  
333 significant associations (see Figure 2). We labeled each glycan trait as “immunoglobulin-linked”  
334 (Ig-linked), “non-immunoglobulin-linked” (non-Ig-linked) or mixed (could be linked to either)  
335 depending on the contribution of Ig and non-Ig linked glycans to the trait value (see  
336 Supplementary Table 9), which was inferred based on information about protein-specific  
337 glycosylation reported previously in [9]. For more details about the procedure of Ig/non-Ig/mixed  
338 assignment see Supplementary Note 4.

339 The resulting network (Figure 2) shows that candidate genes and glycan traits cluster into  
340 two major subnetworks or hubs. The first subnetwork contained the six loci: *FUT8*,  
341 *DERL3/CHCHD10*, *IKZF1*, *TMEM121*, *ST6GAL1*, and *MGAT3*, with *FUT8* as a hub. These loci,  
342 as well as the locus containing *BAGATL1*, were associated with core-fucosylated biantennary  
343 glycans. It is known that the majority of plasma core-fucosylated biantennary glycans are linked to  
344 immunoglobulins [9]. Moreover, in previous studies these seven genes were found to be associated  
345 with N-glycosylation of IgG [13,48]. At the same time these genes were associated with non-  
346 immunoglobulins linked glycans. We can consider this cluster (seven genes out of eleven) as  
347 related to both IgG and non-IgG glycosylation. Taking into account that IgG is the most prevalent  
348 glycosylated plasma protein, it is not surprising that more than a half of replicated loci are actually  
349 associated with immunoglobulins glycosylation. However, previous GWAS on HPLC plasma N-  
350 glycome reported only one locus - *FUT8* - overlapping with IgG loci.

351           The second subnetwork in Figure 2 contained four loci (*ST3GAL4*, *HNF1a*, *FUT3/FUT6*,  
352 and *B3GAT1*, with *FUT3/FUT6* as a hub) associated with tri- and tetra-antennary glycans. It is  
353 known that these types of glycans are linked to plasma proteins other than IgG [9]. Thus we relate  
354 this cluster to non-IgG plasma protein N-glycosylation. Among these four loci we report *ST3GAL4*  
355 as the novel locus controlling the N-glycosylation of non-IgG plasma proteins. We attribute it to  
356 non-immunoglobulins plasma protein N-glycosylation owing to its association with tetra-  
357 antennary glycans.

358

359

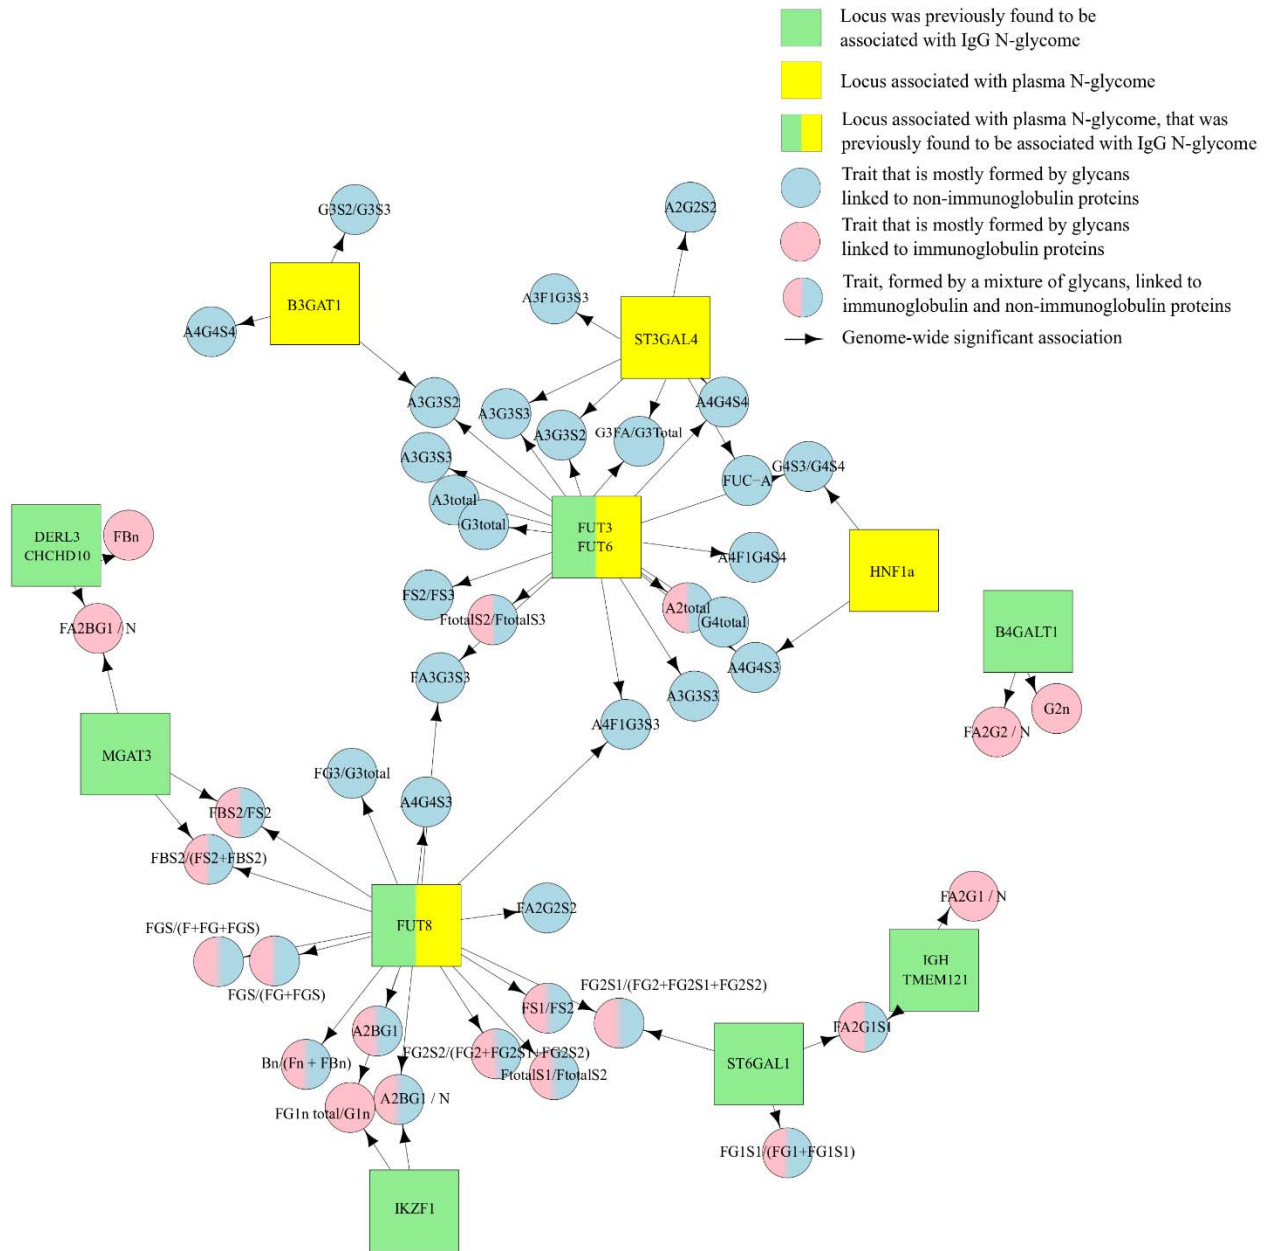

360 **Figure 2. A network view of associations between loci and glycan traits.** Square nodes  
 361 represent genetic loci labeled with the names of candidate gene(s), circle nodes represent glycan  
 362 traits. Green highlights candidate genes, located in genomic regions that were previously found to  
 363 be associated with IgG N-glycome. Yellow highlights candidate genes, located in genomic regions  
 364 associated with plasma N-glycome. Pink color highlights glycan traits mostly containing glycans  
 365 that are linked to immunoglobulins. Blue color highlights traits that are mostly formed by glycans  
 366 linked to other (not immunoglobulin) proteins. Blue/pink color highlights glycan traits, formed by  
 367 a mixture of glycans that are linked to immunoglobulin and non-immunoglobulin proteins. Arrows  
 368 represent genetic association ( $P\text{-value} \leq 1.66 \times 10^{-9}$ ) between gene and specific glycan.

16



## 369 Discussion

370 We conducted the first genome-wide association study of total plasma N-glycome measured by  
371 UPLC technology. Our efforts brought the number of loci significantly associated with total  
372 plasma N-glycome from 6 [26,27] to 16, of which 12 were replicated in our work. This allowed us  
373 to next use a range of *in-silico* functional genomics analyses to identify candidate genes in the  
374 established loci and to obtain insight into biological mechanisms of plasma glycome regulation.

375 Compared to the HPLC glycan measurement technology used in previous GWAS of  
376 plasma N-glycome [26,27], UPLC technology provides better resolution and quantification of  
377 glycan structures, resulting in increased power of association testing: we have detected fourteen vs.  
378 six plasma N-glycome QTLs, despite the reduced sample size of our study (2.763 samples here vs.  
379 3533 samples in [27]). It should be noted that we used new imputation panel (1000 Genomes  
380 instead of HapMap in the previous studies) that more than tripled the number of polymorphisms  
381 analyzed genome-wide (from 2.4M SNPs to 8M). That may have contributed to the higher power  
382 of our study as well. In addition to detecting novel loci, we were able to replicate five (*HNFL1a*,  
383 *FUT6*, *FUT8*, *B3GAT1* and *MGAT5*) of six loci that were reported previously to be associated with  
384 human plasma N-glycome measured using the HPLC technology [26,27].

385 Among six plasma glycome loci that were identified as genome-wide significant previously  
386 [26,27], only one (regions of *FUT8*) had overlap with a locus identified as associated with IgG  
387 glycome composition [13]. A recent multivariate GWAS study of plasma IgG glycome  
388 composition [48] identified five new loci, including the region of *FUT3/FUT6*, thus bringing the  
389 overlap between plasma and IgG glycome loci to two. In our study, among 12 replicated loci,  
390 majority (eight) overlap with loci that were reported to be associated with IgG glycome  
391 composition [13,48] (see Figure 2). We therefore clearly establish a strong overlap between IgG  
392 and plasma glycome loci.

393 In a way, this overlap is to be expected. It is known that majority of serum (and therefore  
394 plasma) glycoproteins are either immunoglobulins produced by B-lymphocytes or glycoproteins  
395 secreted by the liver [53]. We thus expected overlap between IgG and total plasma glycome loci,  
396 and we expected that loci associated with the plasma N-glycome would be enriched by genes with  
397 tissue specific expression in liver and B-cells. Indeed, we find that plasma N-glycome loci are  
398 enriched for genes expressed in plasma cells, antibody producing cells and B-lymphocytes, and we  
399 also find overlap between plasma N-glycome loci and CD19+ eQTLs. However, we neither find

400 enrichment of genes that are expressed in liver (Supplementary table 5c), nor overlap between  
401 plasma N-glycome loci and liver eQTLs. In the future, it will be important to achieve better  
402 resolution and separation of loci that are related to glycosylation of non-immunoglobulin  
403 glycoproteins. This could be achieved either technologically (e.g. performing analyses of IgG-free  
404 fractions of proteins), or this could be attempted via statistical modelling.

405 The genetic variation in the *FUT3/FUT6* locus is a major (in terms of proportion of  
406 variance explained and number of glycans affected) genetic factor for non-immunoglobulins  
407 glycosylation. According to current knowledge, these enzymes catalyze fucosylation of antennary  
408 GlcNAc32, resulting in glycan structures that are not found on IgG [9,54]. This is consistent with  
409 the spectrum of glycan traits associated with *FUT3/FUT6* locus in our work (Figure 2). However,  
410 this locus was recently found to be associated with IgG glycosylation [48]. The authors could not  
411 explain this finding because at that time IgG glycans were not known to contain antennary fucose.  
412 Two explanations could have been proposed for this surprising finding: either, enzymes encoded  
413 by *FUT3/FUT6* locus exhibit non-canonical activity of core fucosylation, or that some IgG glycans  
414 actually do contain antennary fucose. Recently, the latter was demonstrated in work by Russell et  
415 al. [14]. Our work does not show any evince for association between *FUT3/FUT6* locus and core  
416 fucosylation, hence providing an independent evidence that explanation of association between  
417 *FUT3/FUT6* and IgG glycosylation is rooted in presence of antennary fucose on some IgG  
418 glycans.

419 An interesting pattern starts emerging out of study of genetic control of plasma  
420 glycosylation. We now see a clear overlap in genetic control between plasma and IgG  
421 glycosylation, which calls for future studies that would help distinguish between global, cell-,  
422 tissue-, and protein-specific pathways of protein glycosylation. Many (eight out of twelve)  
423 replicated loci contained genes that encode enzymes directly involved in glycosylation  
424 (*FUT3/FUT6*, *FUT8*, *B3GAT1*, *ST6GAL1*, *B4GALT1*, *ST3GAL4*, *MGAT3*, and *MGAT5*). We,  
425 however, start now seeing loci and genes, which are likely to reflect other, more complex, aspects  
426 of plasma glycosylation process. These genes include *DERL3*, which potentially highlights the role  
427 of glycoprotein degradation pathway, and such transcription factors as *HNF1a* and *IKZF1*. Such  
428 regulatory genes, in our view, are plausible candidates that will help linking glycans and complex  
429 human disease. This view is supported by an example of mutations in *HNF1a*, that lead to maturity  
430 onset diabetes of the young (MODY), and to strong distortion of plasma glycosylation profile [24].

431 Further, bigger studies, using refined molecular and computational technologies, will allow  
432 expanding the list of genes involved in regulation of glycome composition, establish cell-, tissue-,  
433 and protein-specific glycosylation pathways and will substantiate and explain the relations  
434 between glycosylation and mechanisms of human health and disease. To facilitate further studies  
435 of glycosylation and of the role of glycome in human health and diseases we have made full results  
436 of our plasma N-glycome GWAS (almost one billion of trait-SNP associations) freely available to  
437 the scientific community via GWAS archive.

438

## 439 **Conclusion**

440 Previous GWAS of HPLC measured plasma N-glycome [27] identified six genes controlling  
441 plasma N-glycosylation of which four implicated genes with obvious links to the glycosylation  
442 process. Here, using a smaller sample but more precise UPLC technology and new GWAS  
443 imputation panels, we confirmed the association of five known loci and identified and replicated  
444 additional seven loci. Our results demonstrate that genetic control of plasma proteins N-  
445 glycosylation is a complex process, which is under control of genes that belong to different  
446 pathways and are expressed in different tissues. Further studies with larger sample size should  
447 further decrypt the genetic architecture of the glycosylation process and explain the relations  
448 between glycosylation and mechanisms of human health and disease.

## 449 **Data availability**

450 Summary statistics from our plasma N-glycome GWAS for 113 glycan traits are available for  
451 interactive exploration at the GWAS archive (<http://gwasarchive.org>). The data set was also  
452 deposited at Zenodo [55]. The data generated in the secondary analyses of this study are included  
453 with this article in the supplementary tables.

## 454 **Materials and Methods**

### 455 **Study cohort description**

456 This work is based on analysis of data from four cohorts - TwinsUK, PainOR, SOCCS and  
457 QMDiab. Sample demographics can be found in Supplementary Table 10.

#### 458 **TwinsUK**

459 The TwinsUK cohort [56] (also referred to as the UK Adult Twin Register) is an a nationwide  
460 registry of volunteer twins in the United Kingdom, with about 13,000 registered twins (83%  
461 female, equal number of monozygotic and dizygotic twins, predominantly middle-aged and older).  
462 The Department of TwinResearch and Genetic Epidemiology at King's College London (KCL)  
463 hosts the registry. From this registry, a total of 2,763 subjects had N-linked total plasma glycan  
464 measurements which were included in the analysis.

#### 465 **QMDiab**

466 The Qatar Metabolomics Study on Diabetes (QMDiab) is a cross-sectional case–control study with  
467 374 participants. QMDiab has been described previously and comprises male and female  
468 participants in near equal proportions, aged between 23 and 71 years, mainly of Arab, South Asian  
469 and Filipino descent [57,58]. The initial study was approved by the Institutional Review Boards of  
470 HMC and Weill Cornell Medicine—Qatar (WCM-Q) (research protocol #11131/11). Written  
471 informed consent was obtained from all participants. All study participants were enrolled between  
472 February 2012 and June 2012 at the Dermatology Department of Hamad Medical Corporation  
473 (HMC) in Doha, Qatar. Inclusion criteria were a primary form of type 2 diabetes (for cases) or an  
474 absence of type 2 diabetes (for controls). Sample collection was conducted in the afternoon, after  
475 the general operating hours of the morning clinic. Patient and control samples were collected in a  
476 random order as they became available and at the same location using identical protocols,  
477 instruments and study personnel. Samples from cases and controls were processed in the  
478 laboratory in parallel and in a blinded manner. Data from five participants were excluded from the  
479 analysis because of incomplete records, leaving 176 patients and 193 controls. Of the 193 control  
480 participants initially enrolled, 12 had HbA1c levels above 6.5% (48 mmol/mol) and were  
481 subsequently classified as cases, resulting in 188 cases and 181 controls.

#### 482 **SOCCS**

483 SOCCS study [59,60] comprised 2,057 (colorectal cancer) CRC cases (61% male; mean age at

484 diagnosis 65.8±8.4 years) and 2,111 population controls (60% males; mean age 67.9±9.0 years) as  
485 ascertained in Scotland. Cases were taken from an independent, prospective, incident CRC case  
486 series and aged <80 years at diagnosis. Control subjects were population controls matched by age  
487 (±5 years), gender and area of residence within Scotland. All participants gave written informed  
488 consent and study approval was from the MultiCentre Research Ethics Committee for Scotland  
489 and Local Research Ethics committee. Sample collection is described in [59,60].

490

### 491 **PainOR**

492 The PainOR [61] is the University of Parma cohort of patients of a retrospective multicenter study  
493 (ClinicalTrials.gov Identifier NCT02037789) part of the PainOMICS project funded by European  
494 Community in the Seventh Framework Programme (Project ID: 602736). The primary objective is  
495 to recognize genetic variants associated with chronic low back pain (CLBP); secondary objectives  
496 are to study glycomics and activomics profiles associated with CLBP. Glycomic and Activomic  
497 approaches aim to reveal alterations in proteome complexity that arise from post-translational  
498 modification that varies in response to changes in the physiological environment, a particularly  
499 important avenue to explore in chronic inflammatory diseases. The study was firstly approved by  
500 the Institutional Review Boards of IRCCS Foundation San Matteo Hospital Pavia and then by the  
501 Institutional Review boards of all clinical centers that enrolled patients. Copies of approvals were  
502 provided to the European Commission before starting the study. Written informed consent was  
503 obtained from all participants. In the period between September 2014 and February 2016, one  
504 thousand of patients (including 38.1% male and 61.9% female, averaging 65±14.5 years) were  
505 enrolled at the Anesthesia, Intensive Care and Pain Therapy Department of University Parma  
506 Hospital. Inclusion criteria were adult Caucasian patients who were suffering of low back pain  
507 (pain between the costal margins and gluteal fold, with or without symptoms into one or both legs)  
508 more than 3 months who were admitted at Pain Department of University Parma Hospital. We  
509 exclude patients with recent history of spinal fractures or low back pain due to cancer or infection.  
510 Sample collection was performed in all patients enrolled, according to the Standard Operating  
511 Procedures published in PlosOne in 2017 [62]. Samples were processed in PainOmics laboratory  
512 in a blinded manner in University of Parma.

### 513 **Genotyping**

514 For full details of the genotyping and imputation see Supplementary Table 11.

515 **TwinsUK**

516 Genotyping was carried out using combination Illumina SNP arrays: HumanHap300,  
517 HumanHap610Q, 1M - Duo and 1.2MDuo 1M. Standard quality control of genotyped data was  
518 applied, with SNPs filtered by sample call rate > 98%, MAF > 1%, SNP call rate: >97% (for SNP  
519 with MAF $\geq$ 5%) or >99% (for SNPs with 1%  $\leq$  MAF <5%), HWE P-value  $\leq 1 \times 10^{-6}$ . In total  
520 275,139 SNPs passed criteria. Imputation was done using IMPUTE2 software with 1000G phase 1  
521 version 3 and mapped to the GRCh37 human genome build. Imputed SNPs were filtered by  
522 imputation quality (SNPTEST proper-info) > 0.7, MAF  $\geq$  1%; MAC  $\geq$  10; leading to 8,557,543  
523 SNPs passed to the GWAS analysis.

524 **QMDiab**

525 Genotyping was carried out using Illumina Omni array 2.5 (version 8). Standard quality control of  
526 genotyped data was applied, with SNPs filtered by sample call rate > 98%, MAF > 1%, SNP call  
527 rate: > 98%, HWE P-value  $\leq 1 \times 10^{-6}$ . In total 1,223,299 SNPs passed criteria. Imputation was  
528 done using SHAPEIT software with 1000G phase 3 version 5 and mapped to the GRCh37 human  
529 genome build. Imputed SNPs were filtered by imputation quality > 0.7, leading to 20,483,276  
530 SNPs passed to the GWAS analysis.

531 **SOCCS**

532 Details of the genotyping procedure can be found here [63]. Genotyping was carried out using  
533 Illumina SNP arrays: HumanHap300 and HumanHap240S. Standard quality control of genotyped  
534 data was applied, with SNPs filtered by sample call rate > 95%, MAF > 1%, SNP call rate: >95%,  
535 HWE P-value  $\leq 1 \times 10^{-6}$ . In total 514,177 SNPs passed criteria. Imputation was done using  
536 SHAPEIT and IMPUTE2 software with 1000 Genomes, phase 1 (Integrated haplotypes, released  
537 June 2014) and mapped to the GRCh37 human genome build. Imputed SNPs were not filtered,  
538 leading to 37,780,221 SNPs passed to the GWAS analysis.

539 **PainOR**

540 Genotyping was carried out using Illumina HumanCore BeadChip. Standard quality control of  
541 genotyped data was applied with SNPs filtered by sample call rate >98%, MAF >0.625%, SNP  
542 call rate: > 97%, HWE P-value  $\leq 1 \times 10^{-6}$ . In total 253,149 SNPs passed criteria. Imputation was  
543 done using Eagle software with HRC r1.1 2016 reference and mapped to the GRCh37 human  
544 genome build. Imputed SNPs were not filtered, leading to 39,127,685 SNPs passed to the GWAS  
545 analysis.

546

## 547 **Phenotyping**

### 548 **Plasma N-glycome quantification**

549 Plasma N-glycome quantification of samples from TwinsUK, PainOR and QMDiab were  
550 performed at Genos by applying the following protocol. Plasma N-glycans were enzymatically  
551 released from proteins by PNGase F, fluorescently labelled with 2-aminobenzamide and cleaned-  
552 up from the excess of reagents by hydrophilic interaction liquid chromatography solid phase  
553 extraction (HILIC-SPE), as previously described. [64]. Fluorescently labelled and purified N-  
554 glycans were separated by HILIC on a Waters BEH Glycan chromatography column, 150 × 2.1  
555 mm, 1.7 µm BEH particles, installed on an Acquity ultra-performance liquid chromatography  
556 (UPLC) instrument (Waters, Milford, MA, USA) consisting of a quaternary solvent manager,  
557 sample manager and a fluorescence detector set with excitation and emission wavelengths of 250  
558 nm and 428 nm, respectively. Following chromatography conditions previously described in  
559 details [64], total plasma N-glycans were separated into 39 peaks for QMDiab, TwinsUK and  
560 PainOR cohorts. The amount of N-glycans in each chromatographic peak was expressed as a  
561 percentage of total integrated area. Glycan peaks (GPs) - quantitative measurements of glycan  
562 levels - were defined by automatic integration of intensity peaks on chromatogram. Number of  
563 defined glycan peaks varied among studies from 36 to 42 GPs.

564 Plasma N-glycome quantification for SOCCS samples were done at NIBRT by applying  
565 the same protocol as for TwinsUK, PainOR and QMDiab, with the only difference in the  
566 excitation wavelength (330 nm instead of 250 nm).

### 567 **Harmonization of glycan peaks**

568 The order of the glycan peaks on a UPLC chromatogram was similar among the studies. However,  
569 depending on the cohort some peaks located near one another might have been indistinguishable.  
570 The number of defined glycan peaks (GPs) varied among studies from 36 to 42. To conduct  
571 GWAS on TwinsUK following by replication in other cohorts, we harmonized the set of peaks (or  
572 GPs). According to the major glycostructures within the GPs we manually created the table of  
573 correspondence between different GPs (or sets of GPs) across all cohorts, where plasma glycome  
574 was measured using UPLC technology. Then, based on this table of correspondence, we defined

575 the list of 36 harmonized GPs (Supplementary Table 12) and the harmonization scheme for each  
576 cohort. We validated the harmonization protocol by comparing with manual re-integration of the  
577 peaks on chromatogram level using 35 randomly chosen samples from 3 cohorts: TwinsUK,  
578 PainOR and QMDiab. We show the full concordance between two approaches (Pearson  
579 correlation coefficient  $R > 0.999$ , see Supplementary Table 12 for the details). We applied this  
580 harmonization procedure for the four cohorts: TwinsUK, QMDiab, CRC and PainOR, leading to  
581 the set of 36 glycan traits in each cohort.

## 582 **Normalization and batch-correction of GPs**

583 Normalization and batch-correction was performed on harmonized UPLC glycan data for four  
584 cohorts: TwinsUK, PainOR, SOCCS and QMDiab. We used total area normalization (the area of  
585 each GP was divided by the total area of the corresponding chromatogram). Normalized glycan  
586 measurements were log<sub>10</sub>-transformed due to right skewness of their distributions and the  
587 multiplicative nature of batch effects. Prior to batch correction, samples with outlying  
588 measurements were removed. Outlier was defined as a sample that had at least one GP that is out  
589 of 3 standard deviation from the mean value of GP. Batch correction was performed on log<sub>10</sub>-  
590 transformed measurements using the ComBat method, where the technical source of variation  
591 (batch and plate number) was modelled as a batch covariate. Again, samples with outlying  
592 measurements were removed.

593 From the 36 directly measured glycan traits, 77 derived traits were calculated (see  
594 Supplementary Table 9). These derived traits average glycosylation features such as branching,  
595 galactosylation and sialylation across different individual glycan structures and, consequently, they  
596 may be more closely related to individual enzymatic activity and underlying genetic  
597 polymorphism. As derived traits represent sums of directly measured glycans, they were calculated  
598 using normalized and batch-corrected glycan measurements after transformation to the proportions  
599 (exponential transformation of batch-corrected measurements). The distribution of 113 glycan  
600 traits can be found in Supplementary Figure 2.

601 Prior to GWAS, the traits were adjusted for age and sex by linear regression. The residuals  
602 were rank transformed to normal distribution (rntransform function in GenABEL [65,66] R  
603 package).



## 604 **Genome-wide association analysis**

605 Discovery GWAS was performed using TwinsUK cohort (N = 2,763) for 113 GP traits. GEMMA  
606 [67] was used to estimate the kinship matrix and to run linear mixed model regression on SNP  
607 dosages assuming additive genetic effects. Obtained summary statistics were corrected for  
608 genomic control inflation factor  $\lambda_{GC}$  to account for any residual population stratification. An  
609 association was considered statistically significant at the genome-wide level if the P-value for an  
610 individual SNP was less than  $5 \times 10^{-8} / (29+1) = 1.66 \times 10^{-9}$ , where 29 is an effective number of  
611 tests (traits) that was estimated as the number of principal components that jointly explained 99%  
612 of the total plasma glycome variance in the TwinsUK sample.

## 613 **Locus definition**

614 In short, we considered SNPs located in the same locus if they were located within 500 Kb from  
615 the leading SNP (the SNP with lowest P-value). Only the SNPs and the traits with lowest P-values  
616 are reported (leading SNP-trait pairs). The detailed procedure of locus definition is described in  
617 Supplementary Note 1.

## 618 **Replication**

619 We have used TwinsUK cohort for the replication of six previously described loci [27] affecting  
620 plasma N-glycome. From each of six loci we have chosen leading SNP with the strongest  
621 association as reported by authors [27]. Since there is no direct trait-to-trait correspondence  
622 between glycan traits measured by HPLC and UPLC technologies we tested the association of the  
623 leading SNPs with all 113 PGPs in TwinsUK cohort. We considered locus as replicated if its  
624 leading SNP showed association with at least one of 113 PGPs with replication threshold of P-  
625 value  $\leq 0.05 / (6 \times 30) = 2.78 \times 10^{-4}$ , where six is number of loci and 30 is a number of principal  
626 components that jointly explained 99% of the total plasma N-glycome variance.

627 For the replication of novel associations, we used data from 3 cohorts: PainOR (N = 294),  
628 QMDiab (N = 327) and SOCCS (N = 472) with total replication sample size of N = 1,048 samples  
629 that have plasma UPLC N-glycome and genotype data (for details of genotyping, imputation and  
630 association analysis, see Supplementary Table 11). We used only the leading SNPs and traits for  
631 the replication that were identified in the discovery step. For these SNPs we conducted a fixed-  
632 effect meta-analysis using METAL software [68] combining association results from three

633 cohorts. The replication threshold was set as  $P\text{-value} \leq 0.05/10 = 0.005$ , where 10 is the number of  
634 replicated loci. Moreover, we checked whether the sign of estimated effect was concordant  
635 between discovery and replication studies.

## 636 **Functional annotation *in-silico***

### 637 **Variant effect prediction (VEP)**

638 For annotation with the variant effect predictor (VEP, [32]), for each of the 12 replicated loci we  
639 have selected the set of SNPs that had strong associations, defined as those located within +/-  
640 250kbp window from the strongest association, and having  $P\text{-value} \leq T$ , where  
641  $\log_{10}(T) = \log_{10}(P_{\min}) + 1$ , where  $P_{\min}$  is the P-value of the strongest association in the locus.

### 642 **Gene-set and tissue/cell enrichment analysis**

643 To prioritize genes in associated regions, gene set enrichment and tissue/cell type enrichment  
644 analyses were carried out using DEPICT software v. 1 rel. 194 [35]. For the analysis we have  
645 chosen independent variants (see “Locus definition”) with  $P\text{-value} \leq 5 \times 10^{-8}/30$  (14 SNPs) and  $P\text{-}$   
646  $\text{value} < 1 \times 10^{-5}/30$  (93 SNPs). We used 1000G data set for calculation of LD [69]s.

### 647 **Pleiotropy with complex traits**

648 We have investigated the overlap between associations obtained here and elsewhere, using  
649 PhenoScanner v1.1 database [36]. For twelve replicated SNPs (Table 1, Table 2) we looked up  
650 traits that have demonstrated genome-wide significant ( $p < 5 \times 10^{-8}$ ) association at the same or at  
651 strongly ( $r^2 < 0.7$ ) linked SNPs.

### 652 **Pleiotropy with eQTLs**

653 To identify genes whose expression levels could potentially mediate the association between SNPs  
654 and plasma glycan traits we performed a summary-data based Mendelian randomization (SMR)  
655 analysis followed by heterogeneity in dependent instruments (HEIDI) method [44]. In short, SMR  
656 test aims at testing the association between gene expression (in a particular tissue) and a trait using  
657 the top associated expression quantitative trait loci (eQTL) as a genetic instrument. Significant  
658 SMR test indicates evidence of causality or pleiotropy but also the possibility that SNPs  
659 controlling gene expression are in linkage disequilibrium with those associated with the traits.  
660 These two situations can be disentangled using the HEIDI (HEterogeneity In Dependent  
661 Instrument) test.

662           The SMR/HEIDI analysis was carried out for leading SNPs that were replicated and were  
663 genome-wide significant ( $P\text{-value} \leq 1.7 \times 10^{-9}$ ) on discovery stage (11 loci in total, see Table 1). We  
664 checked for overlap between these loci and eQTLs in blood [45], 44 tissues provided by the GTEx  
665 database [46] and in 9 cell lines from CEDAR dataset [47], including six circulating immune cell  
666 types (CD4+ T-lymphocytes, CD8+ T lymphocytes, CD19+ B lymphocytes, CD14+ monocytes,  
667 CD15+ granulocytes, platelets. Technical details of the procedure may be found in Supplementary  
668 Note 2. Following Bonferroni procedure, the results of the SMR test were considered statistically  
669 significant if  $P\text{-value}_{\text{SMR}} < 2.445 \times 10^{-6}$  ( $0.05/20448$ , where 20448 is a total number of probes used  
670 in analysis for all three data sets). Inferences whether functional variant may be shared between  
671 plasma glycan trait and expression were made based on HEIDI test:  $p > 0.05$  (likely shared),  $0.05$   
672  $> p > 0.001$  (possibly shared),  $p < 0.001$  (sharing is unlikely).

## 673 **Acknowledgments**

674 This work was supported by the European Community's Seventh Framework Programme funded  
675 project PainOmics (Grant agreement # 602736) and by the European Structural and Investments  
676 funding for the "Croatian National Centre of Research Excellence in Personalized Healthcare"  
677 (contract #KK.01.1.1.01.0010).

678 The work of SSh was supported by the Russian Ministry of Science and Education under the  
679 5-100 Excellence Programme.

680 The work of YT and YA was supported by the Federal Agency of Scientific Organizations  
681 via the Institute of Cytology and Genetics (project #0324-2018-0017).

682 Karsten Suhre and Gaurav Thareja are supported by 'Biomedical Research Program' funds at  
683 Weill Cornell Medicine - Qatar, a program funded by the Qatar Foundation. We thank all staff at  
684 Weill Cornell Medicine - Qatar and Hamad Medical Corporation, and especially all study  
685 participants who made the QMDiab study possible.

686 The SOCCS study was supported by grants from Cancer Research UK (C348/A3758,  
687 C348/A8896, C348/ A18927); Scottish Government Chief Scientist Office (K/OPR/2/2/D333,  
688 CZB/4/94); Medical Research Council (G0000657-53203, MR/K018647/1); Centre Grant from  
689 CORE as part of the Digestive Cancer Campaign (<http://www.corecharity.org.uk>).

690 TwinsUK is funded by the Wellcome Trust, Medical Research Council, European Union, the  
691 National Institute for Health Research (NIHR)-funded BioResource, Clinical Research Facility and  
692 Biomedical Research Centre based at Guy's and St Thomas' NHS Foundation Trust in partnership  
693 with King's College London.

## 694 **Author Contributions**

695 SSh and YT contributed to the design of the study, carried out statistical analysis, produced the  
696 figures; SSh, YT, LK, KS, YA produced wrote the manuscript; LK, FV, SSh, JK contributed to  
697 data harmonization and quality control; MS, MV, FV, TP, JerS, ITA, JK, JelS, MPB, GL  
698 contributed to plasma N-glycome measurements; MM and TS analyzed TwinsUK dataset and  
699 contributed to interpretation of the results; LK, AM, HC, MD, SF analyzed SOCCS dataset and  
700 contributed to interpretation of the results; MA, FW and CD designed PainOR study and  
701 contributed to interpretation of the results; KS and GT analyzed QMDiab dataset and contributed  
702 to interpretation of the results; EL, JD and MG designed CEDAR study and contributed to

703 interpretation of the results; YA and GL conceived and oversaw the study, contributed to the  
704 design and interpretation of the results; all co-authors contributed to the final manuscript revision.

## 705 **Competing financial interests**

706 YA is owner of Maatschap PolyOmica, a private organization, providing services, research and  
707 development in the field of computational and statistical (gen)omics. GL is a founder and owner of  
708 Genos Ltd, biotech company that specializes in glycan analysis and has several patents in the field.  
709 All other authors declare no conflicts of interest. Other authors declare no competing financial  
710 interests.

## 711 **Supplementary Information**

712 Supplementary Figure 1 – Quantile-quantile (QQ) plots of association analysis of 113 PGP

713 Supplementary Figure 2 – Distribution of 113 PGPs measured for 2763 TwinsUK samples  
714 after correction for sex and age

715 Supplementary Note 1 – Locus definition

716 Supplementary Note 2 – Testing for pleiotropic effects using SMR/HEIDI approach

717 Supplementary Note 3 – Correlated Expression & Disease Association Research (CEDAR)

718 Supplementary Note 4 – Classification of glycans into Ig-related and non-Ig

719 Supplementary Table 1 – Replication of previously published associations with plasma N-  
720 glycome.

721 Supplementary Table 2 – Genomic control inflation factor lambda for 113 traits (discovery  
722 GWAS)

723 Supplementary Table 3 – Discovery and replication of fourteen loci associated with plasma N-  
724 glycome ( $P$ -value  $\leq 1.66e-9$ )

725 Supplementary Tables 4 – Results of VEP analysis for the most associated SNPs for twelve  
726 replicated loci

727 Supplementary Table 5 – Results of DEPICT analysis for significant loci ( $1.7e-9$ )

728 Supplementary Table 6 – Results of DEPICT analysis for suggestively significant loci ( $3.3e-7$ )

729 Supplementary Table 7 – Results of PhenoScanner analysis

730 Supplementary Table 8 – Results of SMR-HEIDI analysis

731       Supplementary Table 9 – The description of 36 quantitative plasma N-glycosylation traits  
732 measured by UPLC and 77 derived traits

733       Supplementary Table 10 – Sample demographics

734       Supplementary Table 11 – Details of the genotyping, imputation and association analysis for  
735 studied cohorts

736       Supplementary Table 12 – Correspondence between glycan peaks (GP), obtained in the  
737 following studies: TwinsUK, FinRisk, Dundee, QMDiab, PainOR, SABRE, SOCCS

738       Supplementary Table 13 – Comparison of area summation approach with manual integration  
739 approach

## 740 **References**

- 741 1. Varki A. Biological roles of oligosaccharides: all of the theories are correct // *Glycobiology*.  
742 1993. Vol. 3, № 2. P. 97–130.
- 743 2. Ohtsubo K., Marth J.D. Glycosylation in Cellular Mechanisms of Health and Disease //  
744 *Cell*. 2006. Vol. 126, № 5. P. 855–867.
- 745 3. Skropeta D. The effect of individual N-glycans on enzyme activity // *Bioorg. Med. Chem.*  
746 2009. Vol. 17, № 7. P. 2645–2653.
- 747 4. Takeuchi H. et al. O-Glycosylation modulates the stability of epidermal growth factor-like  
748 repeats and thereby regulates Notch trafficking. // *J. Biol. Chem. American Society for*  
749 *Biochemistry and Molecular Biology*, 2017. Vol. 292, № 38. P. 15964–15973.
- 750 5. Lauc G. et al. Mechanisms of disease: The human N-glycome. // *Biochim. Biophys. Acta.*  
751 Elsevier, 2015. Vol. 1860, № 8. P. 1574–1582.
- 752 6. Poole J. et al. Glycointeractions in bacterial pathogenesis // *Nat. Rev. Microbiol.* Nature  
753 Publishing Group, 2018. P. 1.
- 754 7. Khoury G.A., Baliban R.C., Floudas C.A. Proteome-wide post-translational modification  
755 statistics: frequency analysis and curation of the swiss-prot database. // *Sci. Rep.* Nature  
756 Publishing Group, 2011. Vol. 1.
- 757 8. Craveur P., Rebehmed J., de Brevern A.G. PTM-SD: a database of structurally resolved and  
758 annotated posttranslational modifications in proteins. // *Database (Oxford)*. Oxford  
759 University Press, 2014. Vol. 2014.
- 760 9. Clerc F. et al. Human plasma protein N-glycosylation // *Glycoconj. J.* Springer, 2016. Vol.  
761 33, № 3. P. 309–343.
- 762 10. Freidin M.B. et al. The Association Between Low Back Pain and Composition of IgG  
763 Glycome. // *Sci. Rep.* Nature Publishing Group, 2016. Vol. 6. P. 26815.
- 764 11. Gudelj I. et al. Low galactosylation of IgG associates with higher risk for future diagnosis of  
765 rheumatoid arthritis during 10□years of follow-up // *Biochim. Biophys. Acta - Mol. Basis*  
766 *Dis.* 2018. Vol. 1864, № 6. P. 2034–2039.
- 767 12. Connelly M.A. et al. Inflammatory glycoproteins in cardiometabolic disorders, autoimmune  
768 diseases and cancer // *Clinica Chimica Acta*. 2016. Vol. 459. P. 177–186.
- 769 13. Lauc G. et al. Loci associated with N-glycosylation of human immunoglobulin G show  
770 pleiotropy with autoimmune diseases and haematological cancers. // *PLoS Genet.* / ed.  
771 Gibson G. 2013. Vol. 9, № 1. P. e1003225.
- 772 14. Russell A.C. et al. The N-glycosylation of immunoglobulin G as a novel biomarker of  
773 Parkinson’s disease. // *Glycobiology*. 2017. Vol. 27, № 5. P. 501–510.
- 774 15. Lemmers R.F.H. et al. IgG glycan patterns are associated with type 2 diabetes in  
775 independent European populations // *Biochim. Biophys. Acta - Gen. Subj.* 2017. Vol. 1861,  
776 № 9. P. 2240–2249.
- 777 16. Freeze H.H. Genetic defects in the human glycome // *Nat. Rev. Genet.* Nature Publishing  
778 Group, 2006. Vol. 7, № 7. P. 537–551.
- 779 17. Trbojević Akmačić I. et al. Inflammatory bowel disease associates with proinflammatory  
780 potential of the immunoglobulin G glycome. // *Inflamm. Bowel Dis.* Wolters Kluwer  
781 Health, 2015. Vol. 21, № 6. P. 1237–1247.
- 782 18. Fuster M.M., Esko J.D. The sweet and sour of cancer: glycans as novel therapeutic targets //  
783 *Nat. Rev. Cancer.* Nature Publishing Group, 2005. Vol. 5, № 7. P. 526–542.
- 784 19. Dube D.H., Bertozzi C.R. Glycans in cancer and inflammation — potential for therapeutics

- 785 and diagnostics // *Nat. Rev. Drug Discov.* Nature Publishing Group, 2005. Vol. 4, № 6. P.  
786 477–488.
- 787 20. Pagan J.D., Kitaoka M., Anthony R.M. Engineered Sialylation of Pathogenic Antibodies  
788 *In Vivo* Attenuates Autoimmune Disease. // *Cell.* 2018. Vol. 172, № 3. P. 564–577.e13.
- 789 21. Adamczyk B., Tharmalingam T., Rudd P.M. Glycans as cancer biomarkers. // *Biochim.*  
790 *Biophys. Acta.* 2012. Vol. 1820, № 9. P. 1347–1353.
- 791 22. Maverakis E. et al. Glycans in the immune system and The Altered Glycan Theory of  
792 Autoimmunity: a critical review. // *J. Autoimmun.* 2015. Vol. 57. P. 1–13.
- 793 23. Rodríguez E., Schettters S.T.T., van Kooyk Y. The tumour glyco-code as a novel immune  
794 checkpoint for immunotherapy. // *Nat. Rev. Immunol.* 2018. Vol. 18, № 3. P. 204–211.
- 795 24. Thanabalasingham G. et al. Mutations in HNF1A result in marked alterations of plasma  
796 glycan profile. // *Diabetes.* 2013. Vol. 62, № 4. P. 1329–1337.
- 797 25. Taniguchi N., Kizuka Y. Glycans and cancer: role of N-glycans in cancer biomarker,  
798 progression and metastasis, and therapeutics. // *Adv. Cancer Res.* 2015. Vol. 126. P. 11–51.
- 799 26. Lauc G. et al. Genomics meets glycomics—the first GWAS study of human N-Glycome  
800 identifies HNF1 $\alpha$  as a master regulator of plasma protein fucosylation. // *PLoS Genet.* 2010.  
801 Vol. 6, № 12. P. e1001256.
- 802 27. Huffman J.E. et al. Polymorphisms in B3GAT1, SLC9A9 and MGAT5 are associated with  
803 variation within the human plasma N-glycome of 3533 European adults. // *Hum. Mol.*  
804 *Genet.* Oxford University Press, 2011. Vol. 20, № 24. P. 5000–5011.
- 805 28. Huffman J.E. et al. Comparative performance of four methods for high-throughput  
806 glycosylation analysis of immunoglobulin G in genetic and epidemiological research. //  
807 *Mol. Cell. Proteomics.* 2014. Vol. 13, № 6. P. 1598–1610.
- 808 29. Knežević A. et al. High throughput plasma N-glycome profiling using multiplexed labelling  
809 and UPLC with fluorescence detection // *Analyst.* The Royal Society of Chemistry, 2011.  
810 Vol. 136, № 22. P. 4670.
- 811 30. 1000 Genomes Project Consortium {fname} et al. A map of human genome variation from  
812 population-scale sequencing. // *Nature.* 2010. Vol. 467, № 7319. P. 1061–1073.
- 813 31. Consortium the H.R. et al. A reference panel of 64,976 haplotypes for genotype imputation  
814 // *Nat. Genet.* Nature Publishing Group, 2016. Vol. 48, № 10. P. 1279–1283.
- 815 32. McLaren W. et al. The Ensembl Variant Effect Predictor. // *Genome Biol.* 2016. Vol. 17, №  
816 1. P. 122.
- 817 33. Adzhubei I.A. et al. A method and server for predicting damaging missense mutations. //  
818 *Nat. Methods.* 2010. Vol. 7, № 4. P. 248–249.
- 819 34. Kumar P., Henikoff S., Ng P.C. Predicting the effects of coding non-synonymous variants  
820 on protein function using the SIFT algorithm // *Nat. Protoc.* 2009. Vol. 4, № 7. P. 1073–  
821 1081.
- 822 35. Pers T.H. et al. Biological interpretation of genome-wide association studies using predicted  
823 gene functions // *Nat. Commun.* Nature Publishing Group, 2015. Vol. 6, № 1. P. 5890.
- 824 36. Staley J.R. et al. PhenoScanner: a database of human genotype–phenotype associations //  
825 *Bioinformatics.* 2016. Vol. 32, № 20. P. 3207–3209.
- 826 37. Teslovich T.M. et al. Biological, clinical and population relevance of 95 loci for blood  
827 lipids // *Nature.* 2010. Vol. 466, № 7307. P. 707–713.
- 828 38. Willer C.J. et al. Discovery and refinement of loci associated with lipid levels // *Nat. Genet.*  
829 2013. Vol. 45, № 11. P. 1274–1283.
- 830 39. Shah T. et al. Gene-Centric Analysis Identifies Variants Associated With Interleukin-6



- 831 Levels and Shared Pathways With Other Inflammation Markers // *Circ. Cardiovasc. Genet.*  
832 2013. Vol. 6, № 2. P. 163–170.
- 833 40. Ridker P.M. et al. Loci related to metabolic-syndrome pathways including LEPR, HNF1A,  
834 IL6R, and GCKR associate with plasma C-reactive protein: the Women’s Genome Health  
835 Study. // *Am. J. Hum. Genet.* 2008. Vol. 82, № 5. P. 1185–1192.
- 836 41. Chambers J.C. et al. Genome-wide association study identifies loci influencing  
837 concentrations of liver enzymes in plasma // *Nat. Genet.* Nature Publishing Group, 2011.  
838 Vol. 43, № 11. P. 1131–1138.
- 839 42. Wood A.R. et al. Defining the role of common variation in the genomic and biological  
840 architecture of adult human height // *Nat. Genet.* Nature Publishing Group, a division of  
841 Macmillan Publishers Limited. All Rights Reserved., 2014. Vol. 46, № 11. P. 1173–1186.
- 842 43. Perry J.R.B. et al. Parent-of-origin-specific allelic associations among 106 genomic loci for  
843 age at menarche // *Nature.* 2014. Vol. 514, № 7520. P. 92–97.
- 844 44. Zhu Z. et al. Integration of summary data from GWAS and eQTL studies predicts complex  
845 trait gene targets // *Nat. Genet.* Nature Publishing Group, 2016. Vol. 48, № 5. P. 481–487.
- 846 45. Westra H.-J. et al. Systematic identification of trans eQTLs as putative drivers of known  
847 disease associations. // *Nat. Genet.* Nature Publishing Group, a division of Macmillan  
848 Publishers Limited. All Rights Reserved., 2013. Vol. 45, № 10. P. 1238–1243.
- 849 46. GTEx Consortium et al. Genetic effects on gene expression across human tissues. // *Nature.*  
850 2017. Vol. 550, № 7675. P. 204–213.
- 851 47. Momozawa Y. et al. IBD risk loci are enriched in multigenic regulatory modules  
852 encompassing putative causative genes. // *Nat. Commun.* Nature Publishing Group, 2018.  
853 Vol. 9, № 1. P. 2427.
- 854 48. Shen X. et al. Multivariate discovery and replication of five novel loci associated with  
855 Immunoglobulin G N-glycosylation // *Nat. Commun.* Nature Publishing Group, 2017. Vol.  
856 8, № 1. P. 447.
- 857 49. Pottier N. et al. Expression of SMARCB1 modulates steroid sensitivity in human  
858 lymphoblastoid cells: identification of a promoter snp that alters PARP1 binding and  
859 SMARCB1 expression // *Hum. Mol. Genet.* 2007. Vol. 16, № 19. P. 2261–2271.
- 860 50. Oda Y. et al. Derlin-2 and Derlin-3 are regulated by the mammalian unfolded protein  
861 response and are required for ER-associated degradation // *J. Cell Biol.* 2006. Vol. 172, №  
862 3. P. 383–393.
- 863 51. Ardlie K.G. et al. The Genotype-Tissue Expression (GTEx) pilot analysis: Multitissue gene  
864 regulation in humans // *Science* (80-. ). American Association for the Advancement of  
865 Science, 2015. Vol. 348, № 6235. P. 648–660.
- 866 52. Slack J.M.W. *Molecular Biology of the Cell // Principles of Tissue Engineering.* Garland  
867 Science, 2014. P. 127–145.
- 868 53. Bekesova S. et al. N-glycans in liver-secreted and immunoglobulin-derived protein  
869 fractions. // *J. Proteomics.* NIH Public Access, 2012. Vol. 75, № 7. P. 2216–2224.
- 870 54. Ma B., Simala-Grant J.L., Taylor D.E. Fucosylation in prokaryotes and eukaryotes //  
871 *Glycobiology.* 2006. Vol. 16, № 12. P. 158R–184R.
- 872 55. Sharapov S. et al. Genome-wide association summary statistics for human blood plasma  
873 glycome. 2018.
- 874 56. Moayyeri A. et al. The UK Adult Twin Registry (TwinsUK Resource) // *Twin Res. Hum.*  
875 *Genet.* Cambridge University Press, 2013. Vol. 16, № 01. P. 144–149.
- 876 57. Mook-Kanamori D.O. et al. 1,5-Anhydroglucitol in saliva is a noninvasive marker of short-

- 877 term glycemic control. // *J. Clin. Endocrinol. Metab.* 2014. Vol. 99, № 3. P. E479-83.
- 878 58. Suhre K. et al. Connecting genetic risk to disease end points through the human blood  
879 plasma proteome // *Nat. Commun.* Nature Publishing Group, 2017. Vol. 8. P. 14357.
- 880 59. Vučković F. et al. IgG glycome in colorectal cancer // *Clin. Cancer Res.* American  
881 Association for Cancer Research, 2016. Vol. 22, № 12. P. 3078–3086.
- 882 60. Theodoratou E. et al. Glycosylation of plasma IgG in colorectal cancer prognosis // *Sci.*  
883 *Rep.* Nature Publishing Group, 2016. Vol. 6, № 1. P. 28098.
- 884 61. Allegri M. et al. ‘Omics’ biomarkers associated with chronic low back pain: protocol of a  
885 retrospective longitudinal study // *BMJ Open.* British Medical Journal Publishing Group,  
886 2016. Vol. 6, № 10. P. e012070.
- 887 62. Dagostino C. et al. Validation of standard operating procedures in a multicenter  
888 retrospective study to identify -omics biomarkers for chronic low back pain // *PLoS One* /  
889 ed. Samartzis D. 2017. Vol. 12, № 5. P. e0176372.
- 890 63. Tenesa A. et al. Genome-wide association scan identifies a colorectal cancer susceptibility  
891 locus on 11q23 and replicates risk loci at 8q24 and 18q21 // *Nat. Genet.* Nature Publishing  
892 Group, 2008. Vol. 40, № 5. P. 631–637.
- 893 64. Akmačić I.T. et al. High-throughput glycomics: optimization of sample preparation. //  
894 *Biochem. Biokhimii* □a□. 2015. Vol. 80, № 7. P. 934–942.
- 895 65. Aulchenko Y.S. et al. GenABEL: an R library for genome-wide association analysis. //  
896 *Bioinformatics.* 2007. Vol. 23, № 10. P. 1294–1296.
- 897 66. Karssen L.C., van Duijn C.M., Aulchenko Y.S. The GenABEL Project for statistical  
898 genomics // *F1000Research.* 2016. Vol. 5. P. 914.
- 899 67. Zhou X., Stephens M. Efficient multivariate linear mixed model algorithms for genome-  
900 wide association studies // *Nat. Methods.* 2014. Vol. 11, № 4. P. 407–409.
- 901 68. Willer C.J., Li Y., Abecasis G.R. METAL: fast and efficient meta-analysis of genomewide  
902 association scans. // *Bioinformatics.* 2010. Vol. 26, № 17. P. 2190–2191.
- 903 69. Auton A. et al. A global reference for human genetic variation // *Nature.* 2015. Vol. 526, №  
904 7571.
- 905
